# Supplementary material
Source: Springer Nature journal article supplement (https://www.springermedizin.de/resource/supplementary/12894_2002_17_MOESM2_ESM.pdf/9513714)
Supplement: MOESM2 [file 9513714]

## Additional file 2: Excluded studies

| Author                         | Study                                                                                                                                                 |
|--------------------------------|-------------------------------------------------------------------------------------------------------------------------------------------------------|
| Agha et al, 1995               | Retrospective study - computer records about prostatectomies                                                                                          |
| Al-Rimawi et al, 1994          | Duplicate. Data from [Gormley et al,1992]                                                                                                             |
| Andersen et al, 1996           | Duplicate of [Andersen et al, 1995]                                                                                                                   |
| Andersen et al, 1997           | Pooled analysis: Andersen et al, 1995; Nickel et al, 1996; Marbergher et al1997]                                                                      |
| Andriole et al, 1995           | Not BPH - prostate cancer                                                                                                                             |
| Andriole et al, 1998           | Not BPH - prostate cancer detection                                                                                                                   |
| Aziz & Barathur, 1993          | Meta-analysis of prostate cancer screening criteria                                                                                                   |
| Bolognese et al, 1992          | Cohort study to validate symptom questionnaire                                                                                                        |
| Bonilla et al, 1997            | Intra- & interobserver variability Reanalysed data from an earlier trial.                                                                             |
| Boyle et al, 1996              | Meta-analysis (6 trials)                                                                                                                              |
| Boyle et al, 2000              | Meta-analysis of permixon (serenoa repens)                                                                                                            |
| Brawer et al, 1999             | Full details in Lepor 1996: VA cooperative study                                                                                                      |
| Bruskewitz et al, 1999         | Quality of life data - PLESS (McConnell 1998)                                                                                                         |
| Byrnes et al, 1997             | Pooled analysis: [Byrnes et al,1995; Tenover et al,1997]                                                                                              |
| Chapple et al, 1996            | Meta-analysis of 2 trials: One published as (Abrams et al, 1995).                                                                                     |
| Chueh 1996                     | Open label extension of [Yu et al, 1995]                                                                                                              |
| Cunningham & Hirshkowitz, 1995 | Not BPH - healthy men                                                                                                                                 |
| Ekman et al, 1996              | Duplicate of [Andersen et al, 1995]                                                                                                                   |
| Ekman et al, 1998              | Open label extension of [Beisland et al, 1992]                                                                                                        |
| Ernst, 1999                    | Discussion about meta-analysis of saw palmetto                                                                                                        |
| Foley & Bailey, 1999           | BPH + hematuria vs without hematuria. Control: no treatment                                                                                           |
| Foley et al, 1999              | Assessed BPH with hematuria                                                                                                                           |
| Fourcade et al, 1993           | Surgical treatment of BPH. No mention of finasteride                                                                                                  |
| Geller, 1995                   | Duplicate of data in [MK-906 Finasteride Study Grp, 1991; Stoner 1992; Moore et al, 1995]                                                             |
| Geller, 1996                   | Review                                                                                                                                                |
| Girman et al, 1995             | Community based cohort                                                                                                                                |
| Girman et al, 1996             | Quality of life data from [Gormley et al, 1992; Finasteride study Group, 1993; Rittmaster et al, 1994; Stoner et al, 1994]                            |
| Gormley et al, 1994            | Data from Gormley et al 1992 (North American study)                                                                                                   |
| Grino et al, 1994              | North American & International.<br>Duplicates [Gormley et al, 1992]) & [Finasteride study group 1993] data. [Stoner et al 1994] gives long term data. |
| Guess et al, 1993              | Data from Gormley et al 1992 (North American)                                                                                                         |
| Guess et al, 1996              | Review                                                                                                                                                |
| Hagerty et al, 2000            | Not an RCT - 25 consecutive patients pretreated with finasteride then had TURP                                                                        |
| Hudson 1999                    | Open label extension of[Gormley et al, 1992]                                                                                                          |
| Imperato-McGinley, 1991        | Review                                                                                                                                                |
| Jacobsen et al, 1995           | Discussion of results of population based studies                                                                                                     |
| Jacobsen et al, 1997           | Cohort - population based study                                                                                                                       |
| Jacobsen et al, 1999           | Duplicate of Jacobsen et al, 1997                                                                                                                     |
| Kaplan & Olsson, 1996          | Patient satisfaction survey                                                                                                                           |
| Kaplan 2000                    | Dupliceted information from [McConnell et al, 1998]                                                                                                   |
| Kirby et al, 1993              | Open label extension of [Kirby et al, 1992]                                                                                                           |
| Kuo et al, 1997                | No mention of blinding                                                                                                                                |

|                                                     |                                                                                                                                                              |
|-----------------------------------------------------|--------------------------------------------------------------------------------------------------------------------------------------------------------------|
| Lepor & Stoner, 1995                                | Review                                                                                                                                                       |
| Lepor et al, 1998                                   | Quality of life data from Lepor 1996                                                                                                                         |
| Leskinen et al, 1999                                | BPH was excluded. Inflammatory chronic pelvic pain syndrome                                                                                                  |
| Marbergher et al, 2000                              | Pooled analysis: [Andersen et al, 1995; Nickel et al, 1996; Marbergher et al, 1998]                                                                          |
| Marks et al, 1999                                   | Open label extension of Marks1997                                                                                                                            |
| Martinez-Sarmiento et al, 1997                      | Single centre collaborating in International study                                                                                                           |
| Matzkin & Barak, 1996                               | Methods in [Gormley et al, 1992;Stoner et al, 1994]. Published as [Mazkin et al, 1993]. Duplicate: 1 centre participating in the International study         |
| Matzkin et al, 1992                                 | Effect of finasteride on bone mineral density and metabolism                                                                                                 |
| Matzkin et al, 1993                                 | Methods in [Gormley et al, 1992; Stoner et al, 1994]. Cited in [Matzkin & Barak, 1996]. Duplicate: 1 centre participating in the International study         |
| Miller et al, 1998                                  | Haematuria                                                                                                                                                   |
| MK-906 finasteride study group, 1991                | Duplicate data - preliminary open label data.                                                                                                                |
| Moore et al, 1995                                   | Open label extension of [Gormley et al, 1992]                                                                                                                |
| Nacey et al, 1994                                   | Subset of another unreferenced trial                                                                                                                         |
| Nickel et al, 1998                                  | Placebo response in BPH                                                                                                                                      |
| Nordling & Hald, 1997                               | Definition of BPH and symptoms                                                                                                                               |
| Norman et al, 1993                                  | Duration too short (less than 12 weeks). No data on flow rate or symptom score                                                                               |
| Oesterling et al, 1997                              | PSA only. No data to extract                                                                                                                                 |
| Oesterling et al, 1998                              | Duplicateof [Oesterling et al, 1997]                                                                                                                         |
| Pannek et al, 1998                                  | PSA only. No data to extract                                                                                                                                 |
| Polat et al, 1997                                   | No mention of blinding                                                                                                                                       |
| Rittmaster et al, 1996                              | Small patient numbers. No data to extract. DHT/testosterone levels only                                                                                      |
| Roehborn, 1998                                      | Meta-analysis (6 trials)                                                                                                                                     |
| Roehborn et al, 1999                                | Duplicate of PLESS [McConnell et al, 1998]                                                                                                                   |
| Roehborn et al, 1999a                               | Data from [Lepor et al, 1996; Gormley et al, 1995; Andersen et al, 1995; Nickel et al, 1996; Bonilla et al,1997; McConnel et al,1998; Marbergher et al,1998] |
| Roehborn et al, 1999b                               | Data from [McConnell et al, 1998]                                                                                                                            |
| Roehborn et al, 2000                                | Data from [McConnell et al, 1998]                                                                                                                            |
| Schafer et al, 1999                                 | Open label extension of [Abrams et al, 1999]                                                                                                                 |
| Schwartz et al, 1996                                | Not BPH - healthy men                                                                                                                                        |
| Sieber et al, 1998                                  | Assessed men with haematuria                                                                                                                                 |
| Stoner et al, 1994a (3-year efficacy data)          | North American data superceded by [Moore et al,1995]. [Grino] gives 12 mth data                                                                              |
| Stoner et al, 1994b (Clinical experience)           | North American & International study data                                                                                                                    |
| Stoner et al, 1994b (Maintenance clinical efficacy) | 12 mth extension of [Gormley et al, 1992] (24 mth data)                                                                                                      |
| Strauch et al, 1994                                 | Not BPH - healthy volunteer study                                                                                                                            |
| Tempany et al, 1993                                 | Fewer than10 pts per group                                                                                                                                   |
| Tewari et al, 1995                                  | No data to extract for placebo. Just split by responders & nonresponders.                                                                                    |
| Tveter et al, 1996                                  | Duplicate of [Andersen et al, 1995]                                                                                                                          |
| Wilde et al, 1999                                   | Review                                                                                                                                                       |
| Wilt et al, 1998                                    | Meta-analysis - saw palmetto                                                                                                                                 |
| Wilton et al, 1996                                  | Cohort - population based study                                                                                                                              |
